# Supplementary material for: Cross-platform analysis of cancer microarray data improves gene expression based classification of phenotypes
Source: Springer Nature journal article supplement (doi:10.1186/1471-2105-6-265), 2005-11-04
Supplement: 12859_2005_590_MOESM2_ESM.pdf [file 12859_2005_590_MOESM2_ESM.pdf]

**Additional file 2 - Classification results observed by cross validation using PAM classifiers**

| <i>both data sets integrated</i> |                     |              |
|----------------------------------|---------------------|--------------|
|                                  | MRS                 | QD           |
| Prostate cancer                  | 95.35 %             | 97.67 %      |
| Breast cancer                    | 87.85 %             | 92.52 %      |
| Acute myeloid leukemia           | 71.14 %             | 68.46%       |
|                                  |                     |              |
| <i>original data</i>             |                     |              |
| Prostate cancer                  | Dhanasekaran et al. | Welsh et al. |
|                                  | 92.45 %             | 93.94 %      |
| Breast cancer                    | Gruvberger et al.   | West et al.  |
|                                  | 94.83 %             | 83.67 %      |
| Acute myeloid leukemia           | Bullinger et al.    | Valk et al.  |
|                                  | 76.92 %             | 98.97 %      |
