# Supplementary material for: Cross-platform analysis of cancer microarray data improves gene expression based classification of phenotypes
Source: Springer Nature journal article supplement (doi:10.1186/1471-2105-6-265), 2005-11-04
Supplement: 12859_2005_590_MOESM3_ESM.pdf [file 12859_2005_590_MOESM3_ESM.pdf]

### MRS intersect of all sets

| UnigeneID | Description                                                          | Symbol  | Cytoband      | LocusLinkID | Acc No       |
|-----------|----------------------------------------------------------------------|---------|---------------|-------------|--------------|
| Hs.26985  | disrupted in schizophrenia 1                                         | DISC1   | 1q42.1        | 27185       | AJ506177.1;  |
| Hs.301011 | jumonji domain containing 2B                                         | JMJD2B  | 19p13.3       | 23030       | BC040014.1;  |
| Hs.76536  | transducin (beta)-like 1X-linked                                     | TBL1X   | Xp22.3        | 6907        | Y12781.1;    |
| Hs.50216  | zinc finger protein (ZFD25)                                          | ZFD25   | 7q11.2        | 51427       | AB014735.1;  |
| Hs.211588 | POU domain, class 4, transcription factor 1                          | POU4F1  | 13q21.1-q22   | 5457        | BC041859.1;  |
| Hs.3407   | protein kinase (cAMP-dependent, catalytic) inhibitor gamma           | PKIG    | 20q12-q13.1   | 11142       | AF182032.1;  |
| Hs.278429 | chromosome 9 open reading frame 78                                   | C9orf78 | 9q34.2        | 51759       | AF007871.1;  |
| Hs.90063  | neurocalcin delta                                                    | NCALD   | 8q22-q23      | 83988       | BC036098.1;  |
| Hs.8309   | likely ortholog of mouse membrane bound C2 domain containing protein | MBC2    | 12q13.13      | 23344       | BC013880.2;  |
| Hs.15871  | lysophosphatidic acid phosphatase                                    | ACP6    | 1q21          | 51205       | BC034686.1;  |
| Hs.108806 | AT-binding transcription factor 1                                    | ATBF1   | 16q22.3-q23.1 | 463         | L32833.1;    |
| Hs.421474 | ATP-binding cassette, sub-family A (ABC1), member 5                  | ABCA5   | 17q24.3       | 23461       | NM_172232.1; |
| Hs.14158  | copine III                                                           | CPNE3   | 8q21.2        | 8895        | BC036242.1;  |
| Hs.16134  | serine/threonine kinase 10                                           | STK10   | 5q35.1        | 6793        | AK092814.1;  |
| Hs.153563 | lymphocyte antigen 75                                                | LY75    | 2q24          | 4065        | NM_002349.1; |
| Hs.436348 | potassium channel tetramerisation domain containing 15               | KCTD15  | 19q13.12      | 79047       | AK096843.1;  |
| Hs.371698 | RAE1 RNA export 1 homolog (S. pombe)                                 | RAE1    | 20q13.31      | 8480        | U84720.1;    |
| Hs.226117 | H1 histone family, member 0                                          | H1F0    | 22q13.1       | 3005        | AK091372.1;  |
| Hs.416848 | cathepsin W (lymphopain)                                             | CTSW    | 11q13.1       | 1521        | AF013611.1;  |
| Hs.224397 | transcription elongation factor A (SII), 2                           | TCEA2   | 20q13.33      | 6919        | BC018896.2;  |

Table A: The list of genes found by RFE in all MRS sets.

This list is the intersection of the three gene lists generated on the data of Bullinger et al, Valk et al and of the list generated on the data of both studies integrated by MRS. Abbreviations: MRS, median rank scores; RFE recursive feature elimination

## MRS exclusive Genes

| UnigeneID | Description                                                                                               | Symbol    | Cytoband      | LocusLinkID | Acc No       |
|-----------|-----------------------------------------------------------------------------------------------------------|-----------|---------------|-------------|--------------|
| Hs.78040  | KDEL (Lys-Asp-Glu-Leu) endoplasmic reticulum protein retention receptor 1                                 | KDELRL1   | 19q13.3       | 10945       | X55885.1;    |
| Hs.223851 | fibroblast growth factor 14                                                                               | FGF14     | 13q34         | 2259        | U66200.1;    |
| Hs.129781 | chromosome 21 open reading frame 5                                                                        | C21orf5   | 21q22.2       | 9980        | AJ001857.1;  |
| Hs.110675 | apolipoprotein E                                                                                          | APOE      | 19q13.2       | 348         | Z70760.1;    |
| Hs.65029  | growth arrest-specific 1                                                                                  | GAS1      | 9q21.3-q22    | 2619        | L13698.1;    |
| Hs.449625 | glutamate receptor, metabotropic 8                                                                        | GRM8      | 7q31.3-q32.1  | 2918        | U95025.1;    |
| Hs.438702 | KIAA1055 protein                                                                                          | KIAA1055  | 15q24.1       | 23102       | NM_015079.2; |
| Hs.204039 | aristaless-like homeobox 3                                                                                | ALX3      | 1p21-p13      | 257         | NM_006492.1; |
| Hs.111732 | Fc fragment of IgG binding protein                                                                        | FCGBP     | 19q13.1       | 8857        | D84239.1;    |
| Hs.211819 | matrix metalloproteinase 23B                                                                              | MMP23B    | 1p36.3        | 8510        | AF086353.1;  |
| Hs.370636 | solute carrier family 4, sodium bicarbonate cotransporter, member 8                                       | SLC4A8    | 12q13         | 9498        | AF107099.1;  |
| Hs.423573 | discoidin domain receptor family, member 1                                                                | DDR1      | 6p21.3        | 780         | X74979.1;    |
| Hs.270143 | elastin microfibril interfacier 2                                                                         | EMILIN2   | 18p11.3       | 84034       | AK090519.1;  |
| Hs.288433 | neurotrimin                                                                                               | HNT       | 11q25         | 50863       | NM_016522.2; |
| Hs.113287 | discs, large (Drosophila) homolog-associated protein 2                                                    | DLGAP2    | 8p23          | 9228        | AB000275.1;  |
| Hs.32042  | aspartoacylase (aminoacylase 2, Canavan disease)                                                          | ASPA      | 17pter-p13    | 443         | S67156.1;    |
| Hs.7426   | KIAA0841                                                                                                  | KIAA0841  | 19q13.13      | 23354       | BC013947.2;  |
| Hs.458482 | calcium binding protein 1 (calbrain)                                                                      | CABP1     | 12q24.31      | 9478        | BC015006.1;  |
| Hs.380133 | zinc fingers and homeoboxes 3                                                                             | ZHX3      | 20q12         | 23051       | AB007855.2;  |
| Hs.159066 | chromosome 10 open reading frame 118                                                                      | C10orf118 | 10q26.11      | 55088       | AF273054.1;  |
| Hs.1424   | flavin containing monooxygenase 1                                                                         | FMO1      | 1q23-q25      | 2326        | AK097039.1;  |
| Hs.94234  | frizzled homolog 1 (Drosophila)                                                                           | FZD1      | 7q21          | 8321        | AL049994.1;  |
| Hs.416393 | hypothetical protein FLJ11259                                                                             | FLJ11259  | 12q23.3       | 55332       | BC018435.1;  |
| Hs.306456 | PRP18 pre-mRNA processing factor 18 homolog (yeast)                                                       | PRPF18    | 10p14         | 8559        | U51990.1;    |
| Hs.103126 | human T-cell leukemia virus enhancer factor                                                               | HTLF      | 2p22-p16      | 3344        | U57029.1;    |
| Hs.49658  | KIAA0495                                                                                                  | KIAA0495  | 1p36.32       | 57212       | BC013872.2;  |
| Hs.43728  | glutathione peroxidase 7                                                                                  | GPX7      | 1p32          | 2882        | AF320068.1;  |
| Hs.267871 | ATPase, H+ transporting, lysosomal V0 subunit a isoform 1                                                 | ATP6V0A1  | 17q21         | 535         | U18920.1;    |
| Hs.77813  | sphingomyelin phosphodiesterase 1, acid lysosomal (acid sphingomyelinase)                                 | SMPD1     | 11p15.4-p15.1 | 6609        | BC041164.1;  |
| Hs.158308 | serine (or cysteine) proteinase inhibitor, clade I (neuroserpin), member 2                                | SERPINI2  | 3q26.1-q26.2  | 5276        | BC027859.2;  |
| Hs.105794 | UDP-glucose ceramide glucosyltransferase-like 1                                                           | UGCGL1    | 2q21.1        | 56886       | BC041098.1;  |
| Hs.1376   | hydroxysteroid (11-beta) dehydrogenase 2                                                                  | HSD11B2   | 16q22         | 3291        | BC036780.1;  |
| Hs.235195 | mediator subunit 25                                                                                       | MED25     | 17p11.2       | 55090       | BC000647.2;  |
| Hs.199292 | N-acetylated alpha-linked acidic dipeptidase 2                                                            | NAALAD2   | 11q14.3-q21   | 10003       | BC038840.1;  |
| Hs.8022   | TU3A protein                                                                                              | TU3A      | 3p21.1        | 11170       | AF035283.1;  |
| Hs.528633 | mucin 4, tracheobronchial                                                                                 | MUC4      | 3q29          | 4585        | AF058803.1;  |
| Hs.512620 | carbonic anhydrase XII                                                                                    | CA12      | 15q22         | 771         | BC001012.2;  |
| Hs.300772 | tropomyosin 2 (beta)                                                                                      | TPM2      | 9p13.2-p13.1  | 7169        | X06825.1;    |
| Hs.155119 | EH-domain containing 1                                                                                    | EHD1      | 11q13         | 10938       | AF001434.1;  |
| Hs.8867   | cysteine-rich, angiogenic inducer, 61                                                                     | CYR61     | 1p31-p22      | 3491        | Z98053.1;    |
| Hs.349082 | Transcribed sequence with moderate similarity to protein ref:NP_008996.1 (H.sapiens) CDC37 homolog; CDC37 |           |               |             |              |
| Hs.427055 | nuclear receptor subfamily 0, group B, member 2                                                           | NROB2     | 1p36.1        | 8431        | BC030207.1;  |
| Hs.168762 | unc-51-like kinase 2 (C. elegans)                                                                         | ULK2      | 17p11.2       | 9706        | BC034988.1;  |
| Hs.209205 | protein-O-mannosyltransferase 1                                                                           | POMT1     | 9q34.1        | 10585       | AK074874.1;  |
| Hs.194385 | signal-transducing adaptor protein-2                                                                      | STAP2     | 19p13.3       | 55620       | BC000795.1;  |
| Hs.12440  | Clone 24734 mRNA sequence                                                                                 |           |               |             | AF070625.1;  |
| Hs.75353  | peptidase (mitochondrial processing) alpha                                                                | PMPCA     | 9q34.3        | 23203       | D21064.1;    |
| Hs.151250 | intercellular adhesion molecule 5, telencephalin                                                          | ICAM5     | 19p13.2       | 7087        | U72671.1;    |
| Hs.439911 | telomerase reverse transcriptase                                                                          | TERT      | 5p15.33       | 7015        | AF018167.1;  |
| Hs.120247 | nuclear fragile X mental retardation protein interacting protein 1                                        | NUFIP1    | 13q14         | 26747       | BC001436.1;  |
| Hs.272848 | hypothetical protein FLJ21019                                                                             | FLJ21019  | 17q21.31      | 79990       | AK096767.1;  |
| Hs.169681 | death effector domain containing                                                                          | DEDD      | 1q23.1        | 9191        | BC016724.1;  |
| Hs.226581 | COX15 homolog, cytochrome c oxidase assembly protein (yeast)                                              | COX15     | 10q24         | 1355        | NM_078470.2; |
| Hs.13880  | CGI-143 protein                                                                                           | CGI-143   | 1p36.13-q31.3 | 51027       | BC002771.2;  |
| Hs.36761  | HRAS-like suppressor                                                                                      | HRASLS    | 3q29          | 57110       | AB030816.1;  |
| Hs.154332 | ER degradation enhancer, mannosidase alpha-like 1                                                         | EDEM1     | 3p26.1        | 9695        | D86967.1;    |
| Hs.144683 | CDNA clone MGC:87642 IMAGE:5265802, complete cds                                                          |           |               |             | BC068278.1;  |
| Hs.433291 | ARD1 homolog, N-acetyltransferase (S. cerevisiae)                                                         | ARD1      | Xq28          | 8260        | X77588.1;    |
| Hs.93029  | sparc/osteonectin, owcv and kazal-like domains proteoglycan (testican)                                    | SPOCK     | 5q31          | 6695        | AK094489.1;  |
| Hs.100431 | chemokine (C-X-C motif) ligand 13 (B-cell chemoattractant)                                                | CXCL13    | 4q21          | 10563       | AF044197.1;  |
| Hs.226434 | beta-transducin repeat containing                                                                         | BTRC      | 10q24.32      | 8945        | Y14153.1;    |
| Hs.174944 | CD38 antigen (p45)                                                                                        | CD38      | 4p15          | 952         | D84277.1;    |
| Hs.821    | biglycan                                                                                                  | BGN       | Xq28          | 633         | U11686.1;    |
| Hs.279943 | LIM and cysteine-rich domains 1                                                                           | LMCD1     | 3p26-p24      | 29995       | AK074448.1;  |
| Hs.23671  | lectin, galactoside-binding, soluble, 13 (galectin 13)                                                    | LGALS13   | 19q13.1       | 29124       | AY055826.1;  |
| Hs.26176  | transmembrane protein 16A                                                                                 | TMEM16A   | 11q13.2       | 55107       | BC033036.2;  |
| Hs.298469 | angiotensin I converting enzyme (peptidyl-dipeptidase A) 1                                                | ACE       | 17q23         | 1636        | M29981.1;    |
| Hs.20084  | retinoid X receptor, alpha                                                                                | RXRRA     | 9q34.3        | 6256        | X52773.1;    |
| Hs.159472 | v-abl Abelson murine leukemia viral oncogene homolog 2 (arg, Abelson-related ABL2)                        | ABL2      | 1q24-q25      | 27          | M35296.1;    |
| Hs.316977 | importin 8                                                                                                | IPO8      | 12p11.22      | 10526       | U77494.1;    |
| Hs.380460 | islet cell autoantigen 1, 69kDa                                                                           | ICA1      | 7p22          | 3382        | U38260.1;    |
| Hs.22393  | density-regulated protein                                                                                 | DENR      | 12q24.31      | 8562        | AF038554.1;  |
| Hs.36     | lymphotoxin alpha (TNF superfamily, member 1)                                                             | LTA       | 6p21.3        | 4049        | X01393.1;    |
| Hs.154353 | solute carrier family 9 (sodium/hydrogen exchanger), isoform 7                                            | SLC9A7    | Xp11.3-p11.23 | 84679       | AK056599.1;  |
| Hs.153648 | protein tyrosine phosphatase, receptor type, 1 polypeptide (PTPRF), interacting                           | PPFIA4    | 1q32.1        | 8497        | AF034801.1;  |
| Hs.44899  | nebulin-related anchoring protein                                                                         | NRAP      | 10q24-q26     | 4892        | AK056969.1;  |
| Hs.306251 | v-erb-b2 erythroblastic leukemia viral oncogene homolog 3 (avian)                                         | ERBB3     | 12q13         | 2065        | M29366.1;    |

|           |                                                                                         |              |              |                    |
|-----------|-----------------------------------------------------------------------------------------|--------------|--------------|--------------------|
| Hs.106346 | nucleolar protein 7, 27kDa                                                              | NOL7         | 6p23         | 51406 BC023517.2;  |
| Hs.129142 | DNase II-like acid DNase                                                                | DLAD         | 1p22.3       | 58511 AF333389.1;  |
| Hs.294101 | pre-B-cell leukemia transcription factor 3                                              | PBX3         | 9q33-q34     | 5090 X59841.1;     |
| Hs.194714 | synaptosomal-associated protein, 29kDa                                                  | SNAP29       | 22q11.21     | 9342 BC009715.1;   |
| Hs.24545  | zinc finger protein 444                                                                 | ZNF444       | 19q13.43     | 55311 AF074985.1;  |
| Hs.898    | dystrophia myotonica-protein kinase                                                     | DMPK         | 19q13.3      | 1760 M87313.1;     |
| Hs.107600 | neurofilament, light polypeptide 68kDa                                                  | NEFL         | 8p21         | 4747 AY156690.1;   |
| Hs.361041 | ankyrin repeat domain 26                                                                | ANKRD26      | 10pter-q22.1 | 22852 AK001137.1;  |
| Hs.198278 | 6-phosphofructo-2-kinase/fructose-2,6-biphosphatase 4                                   | PFKFB4       | 3p21-p22     | 5210 D49818.1;     |
| Hs.333150 | zinc finger protein 286                                                                 | ZNF286       | 17p11.2      | 57335 AF086305.1;  |
| Hs.489847 | Ca2+-dependent activator protein for secretion 2                                        | CADPS2       |              | 93664 AF401638.1;  |
| Hs.3532   | nemo like kinase                                                                        | NLK          | 17q11.2      | 51701 AK024686.1;  |
| Hs.69747  | fucosyltransferase 1 (galactoside 2-alpha-L-fucosyltransferase)                         | FUT1         | 19q13.3      | 2523 AF117899.1;   |
| Hs.247734 | protocadherin alpha 2                                                                   | PCDHA2       | 5q31         | 56146 AB002343.1;  |
| Hs.401414 | Wiskott-Aldrich syndrome protein interacting protein                                    | WASPIP       | 2q31.2       | 7456 AF031588.1;   |
| Hs.446415 | sodium channel, nonvoltage-gated 1 alpha                                                | SCNN1A       | 12p13        | 6337 X76180.1;     |
| Hs.375439 | neuro-oncological ventral antigen 2                                                     | NOVA2        | 19q13.3      | 4858 U70477.1;     |
| Hs.150956 | exostosins (multiple)-like 1                                                            | EXTL1        | 1p36.1       | 2134 U67191.1;     |
| Hs.104134 | homeo box (H6 family) 1                                                                 | HMX1         | 4p16.1       | 3166 M99587.1;     |
| Hs.1259   | asialoglycoprotein receptor 2                                                           | ASGR2        | 17p          | 433 U97197.1;      |
| Hs.225129 | N-deacetylase/N-sulfotransferase (heparan glucosaminyl) 2                               | NDST2        | 10q22        | 8509 BC035711.1;   |
| Hs.238679 | Ras-related GTP binding D                                                               | RRAGD        | 6q15-q16     | 58528 AJ420486.1;  |
| Hs.95008  | KISS-1 metastasis-suppressor                                                            | KISS1        | 1q32         | 3814 AY117143.1;   |
| Hs.111373 | KIAA0423                                                                                | KIAA0423     | 14q21.3      | 23116 AB007883.2;  |
| Hs.379039 | tumor suppressor deleted in oral cancer-related 1                                       | DOC-1R       | 11q13        | 10263 AK001498.1;  |
| Hs.105791 | CDNA clone IMAGE:6186815, partial cds                                                   |              |              | BC064139.1;        |
| Hs.193852 | ATP-binding cassette, sub-family C (CFTR/MRP), member 2                                 | ABCC2        | 10q24        | 1244 U63970.1;     |
| Hs.408515 | neuregulin 2                                                                            | NRG2         | 5q23-q33     | 9542 AB005060.1;   |
| Hs.164526 | WW domain binding protein 11                                                            | WBP11        | 12p13.1      | 51729 BC023532.2;  |
| Hs.435074 | potassium voltage-gated channel, shaker-related subfamily, beta member 3                | KCNAB3       | 17p13.1      | 9196 AF016411.1;   |
| Hs.307915 | ATP-binding cassette, sub-family C (CFTR/MRP), member 4                                 | ABCC4        | 13q32        | 10257 AY133678.1;  |
| Hs.116128 | WAP four-disulfide core domain 8                                                        | WFDC8        | 20q13.12     | 90199 AF492015.1;  |
| Hs.123036 | ectonucleoside triphosphate diphosphohydrolase 2                                        | ENTPD2       | 9q34         | 954 U91510.1;      |
| Hs.420830 | hypoxia inducible factor 3, alpha subunit                                               | HIF3A        | 19q13.33     | 64344 NM_152794.1; |
| Hs.147697 | nidogen 2 (osteonidogen)                                                                | NID2         | 14q21-q22    | 22795 AJ223500.1;  |
| Hs.386791 | phosphodiesterase 3A, cGMP-inhibited                                                    | PDE3A        | 12p12        | 5139 AK095203.1;   |
| Hs.123530 | actin-like 7A                                                                           | ACTL7A       | 9q31         | 10881 BC014610.2;  |
| Hs.415117 | sialyltransferase 9 (CMP-NeuAc:lactosylceramide alpha-2,3-sialyltransferase; CSiAT9)    | CSiAT9       | 2p11.2       | 8869 AF344831.1;   |
| Hs.124940 | Rho family GTPase 1                                                                     | RND1         | 12q12-q13    | 27289 U07923.1;    |
| Hs.512814 | topoisomerase (DNA) III beta                                                            | TOP3B        | 22q11.22     | 8940 AL833505.1;   |
| Hs.49344  | mucolipin 3                                                                             | MCOLN3       | 1p22.3       | 55283 AK093948.1;  |
| Hs.82664  | ETAA16 protein                                                                          | ETAA16       | 2p13-p15     | 54465 AK026300.1;  |
| Hs.81073  | fetuin B                                                                                | FETUB        | 3q27         | 26998 NM_014375.1; |
| Hs.152213 | wingless-type MMTV integration site family, member 5A                                   | WNT5A        | 3p21-p14     | 7474 AK090582.1;   |
| Hs.388613 | neogenin homolog 1 (chicken)                                                            | NEO1         | 15q22.3-q23  | 4756 U72391.1;     |
| Hs.315    | mucin 2, intestinal/tracheal                                                            | MUC2         | 11p15.5      | 4583 M22405.1;     |
| Hs.446554 | RAD51 homolog (RecA homolog, E. coli) (S. cerevisiae)                                   | RAD51        | 15q15.1      | 5888 D14134.1;     |
| Hs.159396 | peptidylglycine alpha-amidating monoxygenase COOH-terminal interactor                   | PAMCI        | 12q21.32     | 9182 BC031589.1;   |
| Hs.432329 | hypothetical protein DKFZp564A176                                                       | DKFZp564A176 | 3q21.3       | 84202 BC017323.2;  |
| Hs.66713  | hepatitis delta antigen-interacting protein A                                           | DIPA         | 11q12.1      | 11007 U63825.1;    |
| Hs.444989 | Transcribed sequences                                                                   |              |              |                    |
| Hs.438864 | natriuretic peptide receptor A/guanylate cyclase A (atrialnatriuretic peptide receptor) | NPR1         | 1q21-q22     | 4881 S72628.1;     |
| Hs.65424  | tetranectin (plasminogen binding protein)                                               | TNA          | 3p22-p21.3   | 7123 X64559.1;     |
| Hs.155017 | nuclear receptor interacting protein 1                                                  | NRIP1        | 21q11.2      | 8204 BC040361.1;   |
| Hs.173374 | discoidin, CUB and LCCL domain containing 2                                             | DCBLD2       | 3q12.2       | 131566 BC016815.1; |
| Hs.446303 | nitric oxide synthase 3 (endothelial cell)                                              | NO3          | 7q36         | 4846 S80791.1;     |
| Hs.21413  | solute carrier family 12, (potassium-chloride transporter) member 5                     | SLC12A5      | 20q13.12     | 57468 U79245.1;    |
| Hs.222874 | histone deacetylase 4                                                                   | HDAC4        | 2q37.2       | 9759 AB006626.2;   |
| Hs.349095 | MRNA; cDNA DKFZp686O13119 (from clone DKFZp686O13119)                                   |              |              | BX648277.1;        |
| Hs.98912  | chromosome 6 open reading frame 103                                                     | C6orf103     | 6q24.2       | 79747 AL832192.1;  |
| Hs.7946   | mitochondrial tumor suppressor 1                                                        | MTUS1        | 8p22         | 57509 AF086371.1;  |
| Hs.370530 | tripartite motif-containing 14                                                          | TRIM14       | 9q31.1       | 9830 AK097480.1;   |
| Hs.24808  | hypothetical protein FLJ21168                                                           | FLJ21168     | 1p13.1       | 80143 BC005934.1;  |
| Hs.315366 | protein kinase C, eta                                                                   | PRKCH        | 14q22-q23    | 5583 BC037268.1;   |
| Hs.435609 | tyrosine hydroxylase                                                                    | TH           | 11p15.5      | 7054 AY144494.1;   |
| Hs.161008 | karyopherin alpha 1 (importin alpha 5)                                                  | KPNA1        | 3q21         | 3836 AF035311.1;   |
| Hs.50640  | suppressor of cytokine signaling 1                                                      | SOCS1        | 16p13.13     | 8651 AB000734.1;   |
| Hs.2288   | visinin-like 1                                                                          | VSNL1        | 2p24.3       | 7447 BC022012.2;   |
| Hs.123116 | solute carrier family 12 (sodium/potassium/chloride transporters), member 1             | SLC12A1      | 15q15-q21.1  | 6557 BC040138.2;   |
| Hs.88778  | carbonyl reductase 1                                                                    | CBR1         | 21q22.13     | 873 BC015640.2;    |
| Hs.202300 | olfactory receptor, family 51, subfamily E, member 2                                    | OR51E2       | 11p15        | 81285 AY033942.1;  |
| Hs.310922 | BCL2-like 13 (apoptosis facilitator)                                                    | BCL2L13      | 22q11        | 23786 AF539453.1;  |
| Hs.309257 | dynein 2 light intermediate chain                                                       | D2LIC        | 2p25.1-p24.1 | 51626 BC040558.1;  |
| Hs.438862 | EPS8-like 1                                                                             | EPS8L1       | 19q13.42     | 54869 AK075098.1;  |
| Hs.352341 | stress 70 protein chaperone, microsome-associated, 60kDa                                | STCH         | 21q11.1      | 6782 BC036370.2;   |
| Hs.164267 | dual-specificity tyrosine-(Y)-phosphorylation regulated kinase 3                        | DYRK3        | 1q32         | 8444 Y12735.2;     |
| Hs.79241  | B-cell CLL/lymphoma 2                                                                   | BCL2         | 18q21.33     | 596 M14745.1;      |
| Hs.252839 | interferon-induced protein with tetratricopeptide repeats 5                             | IFIT5        | 10q23.32     | 24138 BC025786.1;  |
| Hs.153003 | serine/threonine kinase 16                                                              | STK16        | 2q34-q37     | 8576 AK096954.1;   |
| Hs.159201 | thymosin, beta 4, Y-linked                                                              | TMSB4Y       | Yq11.221     | 9087 AF000989.1;   |

|           |                                                                                       |               |               |                   |
|-----------|---------------------------------------------------------------------------------------|---------------|---------------|-------------------|
| Hs.377070 | glutamate receptor, ionotropic, AMPA 3                                                | GRIA3         | Xq25-q26      | 2892 U10302.1;    |
| Hs.11494  | fibulin 5                                                                             | FBLN5         | 14q32.1       | 10516 AL110148.1; |
| Hs.276808 | mannosyl (beta-1,4-)-glycoprotein beta-1,4-N-acetylglucosaminyltransferase            | MGAT3         | 22q13.1       | 4248 L48489.1;    |
| Hs.26630  | ATP-binding cassette, sub-family A (ABC1), member 3                                   | ABCA3         | 16p13.3       | 21 U78735.1;      |
| Hs.436928 | deoxyribonuclease I                                                                   | DNASE1        | 16p13.3       | 1773 D17270.1;    |
| Hs.76253  | spinocerebellar ataxia 2 (olivopontocerebellar ataxia 2, autosomal dominant, at:SCA2) | SCA2          | 12q24.1       | 6311 Y08262.1;    |
| Hs.222707 | KIAA1718 protein                                                                      | KIAA1718      | 7q33-q35      | 80853 AK057208.1; |
| Hs.119591 | adaptor-related protein complex 2, sigma 1 subunit                                    | AP2S1         | 19q13.2-q13.3 | 1175 X97074.1;    |
| Hs.85482  | ubiquitin specific protease 13 (isopeptidase T-3)                                     | USP13         | 3q26.2-q26.3  | 8975 U75362.1;    |
| Hs.118057 | placenta-specific 4                                                                   | PLAC4         | 21q22.3       | 191585 L13197.1;  |
| Hs.59260  | solute carrier family 6 (neurotransmitter transporter), member 16                     | SLC6A16       | 19q13.1-q13.4 | 28968 BC034948.1; |
| Hs.376810 | zinc finger protein 23 (KOX 16)                                                       | ZNF23         | 16q22         | 7571 NM_145911.1; |
| Hs.405467 | DNA glycosylase hFPG2                                                                 | FLJ10858      | 4q34.3        | 55247 AB079071.1; |
| Hs.9622   | mitochondrial ribosomal protein S18A                                                  | MRPS18A       | 6p21.3        | 55168 BC010364.1; |
| Hs.321214 | hypothetical protein DKFZp564D0478                                                    | DKFZP564D0478 | 1p35.3        | 84065 AK095889.1; |
| Hs.73875  | fumarylacetoacetate hydrolase (fumarylacetoacetase)                                   | FAH           | 15q23-q25     | 2184 S63548.1;    |

Table B: The list of genes found exclusively in the MRS integrated set.

This list contains only those genes found in an RFE analysis of both leukemia data sets integrated by MRS, that were not found in both single set analyses. Abbreviations: MRS, median rank scores; RFE recursive feature elimination

**MRS Intersect Bullinger and Valk, but not in combined set**

| UnigeneID | Description                                                                                 | Symbol   | Cytoband     | LocusLinkID | Acc No      |
|-----------|---------------------------------------------------------------------------------------------|----------|--------------|-------------|-------------|
| Hs.149609 | integrin, alpha 5 (fibronectin receptor, alpha polypeptide)                                 | ITGA5    | 12q11-q13    | 3678        | X06256.1;   |
| Hs.2340   | junction plakoglobin                                                                        | JUP      | 17q21        | 3728        | M23410.1;   |
| Hs.3416   | adipose differentiation-related protein                                                     | ADFP     | 9p22.1-p21.3 | 123         | X97324.1;   |
| Hs.2463   | angiopoietin 1                                                                              | ANGPT1   | 8q22.3-q23   | 284         | U83508.1;   |
| Hs.351316 | transmembrane 4 superfamily member 1                                                        | TM4SF1   | 3q21-q25     | 4071        | X75684.1;   |
| Hs.96731  | huntingtin interacting protein-1-related                                                    | HIP1R    | 12q24        | 9026        | BC011354.2; |
| Hs.82273  | hypothetical protein FLJ20152                                                               | FLJ20152 | 5p15.1       | 54463       | AL832438.1; |
| Hs.190783 | histidine ammonia-lyase                                                                     | HAL      | 12q22-q24.1  | 3034        | D16626.1;   |
| Hs.166011 | catenin (cadherin-associated protein), delta 1                                              | CTNND1   | 11q11        | 1500        | Z36799.1;   |
| Hs.511765 | GLI pathogenesis-related 1 (glioma)                                                         | GLIPR1   | 12q21.1      | 11010       | U16307.3;   |
| Hs.12     | carcinoembryonic antigen-related cell adhesion molecule 4                                   | CEACAM4  | 19q13.2      | 1089        | D90276.1;   |
| Hs.350927 | solute carrier family 25 (mitochondrial carrier; adenine nucleotide translocator), member 6 | SLC25A6  | Xp22.32      | 293         | AF076617.1; |
| Hs.76873  | hyaluronoglucosaminidase 2                                                                  | HYAL2    | 3p21.3       | 8692        | AK092449.1; |
| Hs.528644 | hypothetical protein FLJ11127                                                               | FLJ11127 | 5p15.2       | 54491       | BC011524.1; |
| Hs.69293  | hexosaminidase B (beta polypeptide)                                                         | HEXB     | 5q13         | 3074        | M19735.1;   |
| Hs.48778  | chromosome 1 open reading frame 24                                                          | C1orf24  | 1q25         | 116496      | AK095547.1; |
| Hs.44313  | v-rel reticuloendotheliosis viral oncogene homolog (avian)                                  | REL      | 2p13-p12     | 5966        | X75042.1;   |
| Hs.352662 | golgi phosphoprotein 2                                                                      | GOLPH2   | 9q21.33      | 51280       | AK075542.1; |
| Hs.76640  | response gene to complement 32                                                              | RGC32    | 13q13.3      | 28984       | AK091099.1; |
| Hs.436944 | sprouty homolog 1, antagonist of FGF signaling (Drosophila)                                 | SPRY1    | 4q28.1       | 10252       | AF041037.1; |

Table C: The list of genes found by RFE in both single-set leukemia analyses, but not in analysis of both sets integrated by MRS.

This list is the intersection of the three gene lists generated on the data of Bullinger et al, Valk et al without the genes also found in the list generated on the data of both studies integrated by MRS. Abbreviations: MRS, median rank scores; RFE recursive feature elimination

**QD intersect of all sets**

| <b>UnigeneID</b> | <b>Description</b>                                                        | <b>Symbol</b> | <b>Cytoband</b> | <b>LocusLinkID</b> | <b>Acc No</b> |
|------------------|---------------------------------------------------------------------------|---------------|-----------------|--------------------|---------------|
| Hs.26985         | disrupted in schizophrenia 1                                              | DISC1         | 1q42.1          | 27185              | AJ506177.1;   |
| Hs.1145          | Wilms tumor 1                                                             | WT1           | 11p13           | 7490               | X51630.1;     |
| Hs.76536         | transducin (beta)-like 1X-linked                                          | TBL1X         | Xp22.3          | 6907               | Y12781.1;     |
| Hs.412117        | annexin A6                                                                | ANXA6         | 5q32-q34        | 309                | J03578.1;     |
| Hs.173380        | CK2 interacting protein 1; HQ0024c protein                                | CKIP-1        | 1q21.3          | 51177              | BC023533.2;   |
| Hs.50216         | zinc finger protein (ZFD25)                                               | ZFD25         | 7q11.2          | 51427              | AB014735.1;   |
| Hs.211588        | POU domain, class 4, transcription factor 1                               | POU4F1        | 13q21.1-q22     | 5457               | BC041859.1;   |
| Hs.3407          | protein kinase (cAMP-dependent, catalytic) inhibitor gamma                | PKIG          | 20q12-q13.1     | 11142              | AF182032.1;   |
| Hs.278429        | chromosome 9 open reading frame 78                                        | C9orf78       | 9q34.2          | 51759              | AF007871.1;   |
| Hs.370374        | YY1 associated protein                                                    | YAP           | 1q22            | 55249              | AF203474.1;   |
| Hs.151449        | suppression of tumorigenicity 18 (breast carcinoma) (zinc finger protein) | ST18          | 8q11.22         | 9705               | AB011107.1;   |
| Hs.8309          | likely ortholog of mouse membrane bound C2 domain containing protein      | MBC2          | 12q13.13        | 23344              | BC013880.2;   |
| Hs.15871         | lysophosphatidic acid phosphatase                                         | ACP6          | 1q21            | 51205              | BC034686.1;   |
| Hs.75485         | ornithine aminotransferase (gyrate atrophy)                               | OAT           | 10q26           | 4942               | BC016928.1;   |
| Hs.421474        | ATP-binding cassette, sub-family A (ABC1), member 5                       | ABCA5         | 17q24.3         | 23461              | NM_172232.1;  |
| Hs.14158         | copine III                                                                | CPNE3         | 8q21.2          | 8895               | BC036242.1;   |
| Hs.154437        | phosphodiesterase 2A, cGMP-stimulated                                     | PDE2A         | 11q13.3         | 5138               | U67733.1;     |
| Hs.16134         | serine/threonine kinase 10                                                | STK10         | 5q35.1          | 6793               | AK092814.1;   |
| Hs.129959        | interleukin 17 receptor C                                                 | IL17RC        | 3p25.3          | 84818              | NM_153460.1;  |
| Hs.153563        | lymphocyte antigen 75                                                     | LY75          | 2q24            | 4065               | NM_002349.1;  |
| Hs.371698        | RAE1 RNA export 1 homolog (S. pombe)                                      | RAE1          | 20q13.31        | 8480               | U84720.1;     |
| Hs.226117        | H1 histone family, member 0                                               | H1F0          | 22q13.1         | 3005               | AK091372.1;   |
| Hs.416848        | cathepsin W (lymphopain)                                                  | CTSW          | 11q13.1         | 1521               | AF013611.1;   |
| Hs.368746        | neuropilin 2                                                              | NRP2          | 2q33.3          | 8828               | AF016098.1;   |

Table D: The list of genes found by RFE in all QD sets.

This list is the intersection of the three gene lists generated on the data of Bullinger et al, Valk et al and of the list generated on the data of both studies integrated by QD. Abbreviations: QD, quantile discretization; RFE recursive feature elimination

QD exclusive genes

| UnigeneID | Description                                                                                               | Symbol   | Cytoband        | LocusLinkID | Acc No       |
|-----------|-----------------------------------------------------------------------------------------------------------|----------|-----------------|-------------|--------------|
| Hs.407934 | neuron navigator 2                                                                                        | NAV2     | 11p15.1         | 89797       | BC035903.1;  |
| Hs.223851 | fibroblast growth factor 14                                                                               | FGF14    | 13q34           | 2259        | U66200.1;    |
| Hs.287460 | PDZ domain containing 3                                                                                   | PDZK3    | 5p13.3          | 23037       | AB002298.2;  |
| Hs.129781 | chromosome 21 open reading frame 5                                                                        | C21orf5  | 21q22.2         | 9980        | AJ001857.1;  |
| Hs.7984   | pleckstrin homology, Sec7 and coiled-coil domains 3                                                       | PSCD3    | 7p22.2          | 9265        | AJ223957.1;  |
| Hs.178499 | HSPC063 protein                                                                                           | HSPC063  | 11q24.3         | 29068       | BC040658.1;  |
| Hs.65029  | growth arrest-specific 1                                                                                  | GAS1     | 9q21.3-q22      | 2619        | L13698.1;    |
| Hs.438702 | KIAA1055 protein                                                                                          | KIAA1055 | 15q24.1         | 23102       | NM_015079.2; |
| Hs.270143 | elastin microfibril interfacier 2                                                                         | EMILIN2  | 18p11.3         | 84034       | AK090519.1;  |
| Hs.70669  | HMP19 protein                                                                                             | HMP19    | 5q35.2          | 51617       | AK098398.1;  |
| Hs.32042  | aspartoacylase (aminoacylase 2, Canavan disease)                                                          | ASPA     | 17pter-p13      | 443         | S67156.1;    |
| Hs.458482 | calcium binding protein 1 (calbrain)                                                                      | CABP1    | 12q24.31        | 9478        | BC015006.1;  |
| Hs.380133 | zinc fingers and homeoboxes 3                                                                             | ZHX3     | 20q12           | 23051       | AB007855.2;  |
| Hs.37558  | riboflavin kinase                                                                                         | RFK      | 9q21.31         | 55312       | AF038172.1;  |
| Hs.370480 | ATP-binding cassette, sub-family B (MDR/TAP), member 7                                                    | ABCB7    | Xq12-q13        | 22          | BC006323.2;  |
| Hs.103126 | human T-cell leukemia virus enhancer factor                                                               | HTLF     | 2p22-p16        | 3344        | U57029.1;    |
| Hs.158530 | Rap guanine nucleotide exchange factor (GEF)-like 1                                                       | RAPGEFL1 | 17q21.2         | 51195       | U78518.1;    |
| Hs.49658  | KIAA0495                                                                                                  | KIAA0495 | 1p36.32         | 57212       | BC013872.2;  |
| Hs.77813  | sphingomyelin phosphodiesterase 1, acid lysosomal (acid sphingomyelinase)                                 | SMPD1    | 11p15.4-p15.1   | 6609        | BC041164.1;  |
| Hs.158308 | serine (or cysteine) proteinase inhibitor, clade I (neuroserpin), member 2                                | SERPIN2  | 3q26.1-q26.2    | 5276        | BC027859.2;  |
| Hs.117874 | paired basic amino acid cleaving system 4                                                                 | PACE4    | 15q26           | 5046        | D87995.1;    |
| Hs.1376   | hydroxysteroid (11-beta) dehydrogenase 2                                                                  | HSD11B2  | 16q22           | 3291        | BC036780.1;  |
| Hs.1395   | early growth response 2 (Krox-20 homolog, Drosophila)                                                     | EGR2     | 10q21.1         | 1959        | BC035625.1;  |
| Hs.31653  | Rho-related BTB domain containing 3                                                                       | RHOBTB3  | 5q15            | 22836       | BC041337.2;  |
| Hs.512681 | sodium channel, nonvoltage-gated 1, delta                                                                 | SCNN1D   | 1p36.3-p36.2    | 6339        | X38254.1;    |
| Hs.235195 | mediator subunit 25                                                                                       | MED25    | 17p11.2         | 55090       | BC000647.2;  |
| Hs.199292 | N-acetylated alpha-linked acidic dipeptidase 2                                                            | NAALAD2  | 11q14.3-q21     | 10003       | BC038840.1;  |
| Hs.48384  | heparan sulfate (glucosamine) 3-O-sulfotransferase 3B1                                                    | HS3ST3B1 | 17p12-p11.2     | 9953        | AL832823.1;  |
| Hs.282938 | collagen, type IV, alpha 4                                                                                | COL4A4   | 2q35-q37        | 1286        | X1053.1;     |
| Hs.334475 | hypothetical protein FLJ10634                                                                             | FLJ10634 | 15q14           | 55192       | BC000048.2;  |
| Hs.8022   | TU3A protein                                                                                              | TU3A     | 3p21.1          | 11170       | AF035283.1;  |
| Hs.300772 | tropomyosin 2 (beta)                                                                                      | TPM2     | 9p13.2-p13.1    | 7169        | X06825.1;    |
| Hs.42343  | MYST histone acetyltransferase 1                                                                          | MYST1    | 16p11.2         | 84148       | BC037773.1;  |
| Hs.155119 | EH-domain containing 1                                                                                    | EHD1     | 11q13           | 10938       | AF001434.1;  |
| Hs.8867   | cysteine-rich, angiogenic inducer, 61                                                                     | CYR61    | 1p31-p22        | 3491        | Z98053.1;    |
| Hs.82568  | cytochrome P450, family 27, subfamily A, polypeptide 1                                                    | CYP27A1  | 2q33-qter       | 1593        | X59812.1;    |
| Hs.349082 | Transcribed sequence with moderate similarity to protein ref:NP_008996.1 (H.sapiens) CDC37 homolog; CDC37 | CDC37    |                 |             |              |
| Hs.278489 | matrilin 4                                                                                                | MATN4    | 20q13.1-q13.2   | 8785        | AK074495.1;  |
| Hs.427055 | nuclear receptor subfamily 0, group B, member 2                                                           | NROB2    | 1p36.1          | 8431        | BC030207.1;  |
| Hs.168762 | unc-51-like kinase 2 (C. elegans)                                                                         | ULK2     | 17p11.2         | 9706        | BC034988.1;  |
| Hs.331141 | aldehyde dehydrogenase 2 family (mitochondrial)                                                           | ALDH2    | 12q24.2         | 217         | M54931.1;    |
| Hs.2393   | phosphorylase kinase, alpha 1 (muscle)                                                                    | PHKA1    | Xq12-q13        | 5255        | X73878.1;    |
| Hs.194385 | signal-transducing adaptor protein-2                                                                      | STAP2    | 19p13.3         | 55620       | BC000795.1;  |
| Hs.150206 | histone 1, H1a                                                                                            | HIST1H1A | 6p21.3          | 3024        | BC069492.1;  |
| Hs.2799   | hyaluronan and proteoglycan link protein 1                                                                | HAPLN1   | 5q14.3          | 1404        | X78076.1;    |
| Hs.12440  | Clone 24734 mRNA sequence                                                                                 |          |                 |             | AF070625.1;  |
| Hs.1281   | complement component 5                                                                                    | C5       | 9q33-q34        | 727         | M57729.1;    |
| Hs.300863 | l(3)mbt-like (Drosophila)                                                                                 | L3MBTL   | 20q13.12        | 26013       | BC039820.1;  |
| Hs.7122   | scrapie responsive protein 1                                                                              | SCRG1    | 4q31-q32        | 11341       | BC017583.2;  |
| Hs.151250 | intercellular adhesion molecule 5, telencephalin                                                          | ICAM5    | 19p13.2         | 7087        | U72671.1;    |
| Hs.439911 | telomerase reverse transcriptase                                                                          | TERT     | 5p15.33         | 7015        | AF018167.1;  |
| Hs.272848 | hypothetical protein FLJ21019                                                                             | FLJ21019 | 17q21.31        | 79990       | AK096767.1;  |
| Hs.226581 | COX15 homolog, cytochrome c oxidase assembly protein (yeast)                                              | COX15    | 10q24           | 1355        | NM_078470.2; |
| Hs.13880  | CGI-143 protein                                                                                           | CGI-143  | 1p36.13-q31.3   | 51027       | BC002771.2;  |
| Hs.53250  | bone morphogenetic protein receptor, type II (serine/threonine kinase)                                    | BMPR2    | 2q33-q34        | 659         | U25110.1;    |
| Hs.85567  | suppressor of variegation 3-9 homolog 2 (Drosophila)                                                      | SUV39H2  | 10p13           | 79723       | AL834488.1;  |
| Hs.10082  | potassium intermediate/small conductance calcium-activated channel, subfamily N, member 4                 | KCNN4    | 19q13.2         | 3783        | AF022797.1;  |
| Hs.226434 | beta-transducin repeat containing                                                                         | BTRC     | 10q24.32        | 8945        | Y14153.1;    |
| Hs.193143 | KIAA1069 protein                                                                                          | KIAA1069 | 3q25.2-q25.31   | 23007       | AK093601.1;  |
| Hs.174944 | CD38 antigen (p45)                                                                                        | CD38     | 4p15            | 952         | D84277.1;    |
| Hs.12040  | STE20-like kinase                                                                                         | JIK      | 12q             | 51347       | AF328731.1;  |
| Hs.25040  | zinc finger protein 239                                                                                   | ZNF239   | 10q11.22-q11.23 | 8187        | X82128.1;    |
| Hs.279943 | LIM and cysteine-rich domains 1                                                                           | LMCD1    | 3p26-p24        | 29995       | AK074448.1;  |
| Hs.414110 | potassium voltage-gated channel, Shal-related subfamily, member 3                                         | KCND3    | 1p13.3          | 3752        | AF048713.1;  |
| Hs.98314  | MRNA; cDNA DKFZp586L0120 (from clone DKFZp586L0120)                                                       |          |                 |             | AK074200.1;  |
| Hs.434406 | zinc finger protein 539                                                                                   | ZNF539   | 19p12           | 399655      | AL832713.1;  |
| Hs.149376 | retinoschisis (X-linked, juvenile) 1                                                                      | RS1      | Xp22.2-p22.1    | 6247        | AF014459.1;  |
| Hs.298469 | angiotensin I converting enzyme (peptidyl-dipeptidase A) 1                                                | ACE      | 17q23           | 1636        | M29981.1;    |
| Hs.79136  | solute carrier family 39 (zinc transporter), member 6                                                     | SLC39A6  | 18q12.2         | 25800       | BC039498.1;  |
| Hs.406074 | PRKC, apoptosis, WT1, regulator                                                                           | PAWR     | 12q21           | 5074        | AK024560.1;  |
| Hs.159472 | v-abl Abelson murine leukemia viral oncogene homolog 2 (arg, Abelson-related gene)                        | ABL2     | 1q24-q25        | 27          | M35296.1;    |
| Hs.316977 | importin 8                                                                                                | IPO8     | 12p11.22        | 10526       | U77494.1;    |
| Hs.380460 | islet cell autoantigen 1, 69kDa                                                                           | ICA1     | 7p22            | 3382        | U38260.1;    |
| Hs.1634   | cell division cycle 25A                                                                                   | CDC25A   | 3p21            | 993         | AY137580.1;  |
| Hs.154353 | solute carrier family 9 (sodium/hydrogen exchanger), isoform 7                                            | SLC9A7   | Xp11.3-p11.23   | 84679       | AK056599.1;  |
| Hs.44899  | nebulin-related anchoring protein                                                                         | NRAP     | 10q24-q26       | 4892        | AK056969.1;  |
| Hs.306251 | v-erb-b2 erythroblastic leukemia viral oncogene homolog 3 (avian)                                         | ERBB3    | 12q13           | 2065        | M29366.1;    |
| Hs.106346 | nucleolar protein 7, 27kDa                                                                                | NOL7     | 6p23            | 51406       | BC023517.2;  |
| Hs.380819 | phospholipase D1, phosphatidylcholine-specific                                                            | PLD1     | 3q26            | 5337        | AK091897.1;  |
| Hs.2303   | erythropoietin                                                                                            | EPO      | 7q22            | 2056        | X02157.1;    |
| Hs.20423  | CCR4-NOT transcription complex, subunit 4                                                                 | CNOT4    | 7q22-qter       | 4850        | BC035590.1;  |
| Hs.294101 | pre-B-cell leukemia transcription factor 3                                                                | PBX3     | 9q33-q34        | 5090        | X59841.1;    |
| Hs.446568 | TRK-fused gene                                                                                            | TFG      | 3q11-q12        | 10342       | BC023599.2;  |

|           |                                                                                                                 |               |               |                    |
|-----------|-----------------------------------------------------------------------------------------------------------------|---------------|---------------|--------------------|
| Hs.75256  | regulator of G-protein signalling 1                                                                             | RGS1          | 1q31          | 5996 S59049.1;     |
| Hs.419815 | epidermal growth factor (beta-urogastrone)                                                                      | EGF           | 4q25          | 1950 X04571.1;     |
| Hs.333150 | zinc finger protein 286                                                                                         | ZNF286        | 17p11.2       | 57335 AF086305.1;  |
| Hs.489847 | Ca <sup>2+</sup> -dependent activator protein for secretion 2                                                   | CADPS2        |               | 93664 AF401638.1;  |
| Hs.928    | proteinase 3 (serine proteinase, neutrophil, Wegener granulomatosis autoantigen)                                | PRTN3         | 19p13.3       | 5657 X56606.1;     |
| Hs.3532   | nemo like kinase                                                                                                | NLK           | 17q11.2       | 51701 AK024686.1;  |
| Hs.199263 | serine threonine kinase 39 (STE20/SPS1 homolog, yeast)                                                          | STK39         | 2q31.1        | 27347 AF017635.1;  |
| Hs.31095  | microtubule-associated protein 4                                                                                | MAP4          | 3p21          | 4134 U19727.1;     |
| Hs.247734 | protocadherin alpha 2                                                                                           | PCDHA2        | 5q31          | 56146 AB002343.1;  |
| Hs.375439 | neuro-oncological ventral antigen 2                                                                             | NOVA2         | 19q13.3       | 4858 U70477.1;     |
| Hs.150956 | exostosins (multiple)-like 1                                                                                    | EXTL1         | 1p36.1        | 2134 U67191.1;     |
| Hs.425777 | ubiquitin-conjugating enzyme E2L 6                                                                              | UBE2L6        | 11q12         | 9246 AF031141.1;   |
| Hs.225129 | N-deacetylase/N-sulfotransferase (heparan glucosaminyl) 2                                                       | NDST2         | 10q22         | 8509 BC035711.1;   |
| Hs.95008  | KISS-1 metastasis-suppressor                                                                                    | KISS1         | 1q32          | 3814 AY117143.1;   |
| Hs.193852 | ATP-binding cassette, sub-family C (CFTR/MRP), member 2                                                         | ABCC2         | 10q24         | 1244 U63970.1;     |
| Hs.311097 | exportin 4                                                                                                      | XPO4          | 13q11         | 64328 AL831819.2;  |
| Hs.81118  | leukotriene A4 hydrolase                                                                                        | LTA4H         | 12q22         | 4048 BC032528.1;   |
| Hs.243987 | GATA binding protein 4                                                                                          | GATA4         | 8p23.1-p22    | 2626 D78260.1;     |
| Hs.227489 | syntrophin associated serine/threonine kinase                                                                   | SAST          | 19p13.2       | 22983 BC027985.1;  |
| Hs.436852 | fibroblast activation protein, alpha                                                                            | FAP           | 2q23          | 2191 U76833.1;     |
| Hs.184916 | clathrin, heavy polypeptide-like 1                                                                              | CLTCL1        | 22q11.2       | 8218 L77568.1;     |
| Hs.758    | RAS p21 protein activator (GTPase activating protein) 1                                                         | RASA1         | 5q13.3        | 5921 BC033015.2;   |
| Hs.123036 | ectonucleoside triphosphate diphosphohydrolase 2                                                                | ENTPD2        | 9q34          | 954 U91510.1;      |
| Hs.420830 | hypoxia inducible factor 3, alpha subunit                                                                       | HIF3A         | 19q13.33      | 64344 NM_152794.1; |
| Hs.386791 | phosphodiesterase 3A, cGMP-inhibited                                                                            | PDE3A         | 12p12         | 5139 AK095203.1;   |
| Hs.123530 | actin-like 7A                                                                                                   | ACTL7A        | 9q31          | 10881 BC014610.2;  |
| Hs.415117 | sialyltransferase 9 (CMP-NeuAc:lactosylceramide alpha-2,3-sialyltransferase; GM3 synthase)                      | SIAT9         | 2p11.2        | 8869 AF344831.1;   |
| Hs.410113 | restin (Reed-Steinberg cell-expressed intermediate filament-associated protein)                                 | RSN           | 12q24.3       | 6249 M97501.1;     |
| Hs.128856 | scavenger receptor class A, member 3                                                                            | SCARA3        | 8p21          | 51435 NM_016240.2; |
| Hs.49344  | mucolin 3                                                                                                       | MCOLN3        | 1p22.3        | 55283 AK093948.1;  |
| Hs.82664  | ETAA16 protein                                                                                                  | ETAA16        | 2p13-p15      | 54465 AK026300.1;  |
| Hs.290873 | protein phosphatase, EF hand calcium-binding domain 2                                                           | PPEF2         | 4q21.21       | 5470 AF023457.1;   |
| Hs.444003 | arylacetylamide deacetylase (esterase)                                                                          | AADAC         | 3q21.3-q25.2  | 13 L32179.1;       |
| Hs.388613 | neogenin homolog 1 (chicken)                                                                                    | NEO1          | 15q22.3-q23   | 4756 U72391.1;     |
| Hs.11166  | thrombopoietin (myeloproliferative leukemia virus oncogene ligand, megakaryocyte growth and development factor) | THPO          | 3q27          | 7066 D32047.1;     |
| Hs.315    | mucin 2, intestinal/tracheal                                                                                    | MUC2          | 11p15.5       | 4583 M22405.1;     |
| Hs.317335 | ClpP caseinolytic protease, ATP-dependent, proteolytic subunit homolog (E. coli)                                | CLPP          | 19p13.3       | 8192 BC002956.1;   |
| Hs.444989 | Transcribed sequences                                                                                           |               |               |                    |
| Hs.1939   | v-erb-a erythroblastic leukemia viral oncogene homolog 4 (avian)                                                | ERBB4         | 2q33.3-q34    | 2066 L07868.1;     |
| Hs.282326 | Down syndrome critical region gene 1                                                                            | DSCR1         | 21q22.1-q22.2 | 1827 U85267.2;     |
| Hs.26550  | retinoid X receptor, gamma                                                                                      | RXRG          | 1q22-q23      | 6258 BC012063.1;   |
| Hs.435639 | ADP-ribosylation factor 4                                                                                       | ARF4          | 3p21.2-p21.1  | 378 AF493883.1;    |
| Hs.155017 | nuclear receptor interacting protein 1                                                                          | NRIP1         | 21q11.2       | 8204 BC040361.1;   |
| Hs.351798 | FLJ20298 protein                                                                                                | FLJ20298      | Xq22.3        | 54885 AK091248.1;  |
| Hs.446303 | nitric oxide synthase 3 (endothelial cell)                                                                      | NOS3          | 7q36          | 4846 S80791.1;     |
| Hs.101174 | microtubule-associated protein tau                                                                              | MAPT          | 17q21.1       | 4137 BC040444.1;   |
| Hs.98912  | chromosome 6 open reading frame 103                                                                             | C6orf103      | 6q24.2        | 79747 AL832192.1;  |
| Hs.24808  | hypothetical protein FLJ21168                                                                                   | FLJ21168      | 1p13.1        | 80143 BC005934.1;  |
| Hs.21572  | KIAA0644 gene product                                                                                           | KIAA0644      | 7p15.1        | 9865 BC036337.1;   |
| Hs.315366 | protein kinase C, eta                                                                                           | PRKCH         | 14q22-q23     | 5583 BC037268.1;   |
| Hs.435609 | tyrosine hydroxylase                                                                                            | TH            | 11p15.5       | 7054 AY144494.1;   |
| Hs.21542  | ATP/GTP binding protein 1                                                                                       | AGTPBP1       | 9q22.1        | 23287 AJ420433.1;  |
| Hs.161008 | karyopherin alpha 1 (importin alpha 5)                                                                          | KPNA1         | 3q21          | 3836 AF035311.1;   |
| Hs.50640  | suppressor of cytokine signaling 1                                                                              | SOCS1         | 16p13.13      | 8651 AB000734.1;   |
| Hs.2288   | visinin-like 1                                                                                                  | VSNL1         | 2p24.3        | 7447 BC022012.2;   |
| Hs.135554 | heat shock protein (hsp110 family)                                                                              | APG-1         | 4q28          | 22824 BC040560.1;  |
| Hs.88778  | carbonyl reductase 1                                                                                            | CBR1          | 21q22.13      | 873 BC015640.2;    |
| Hs.75334  | exostosins (multiple) 2                                                                                         | EXT2          | 11p12-p11     | 2132 U72263.1;     |
| Hs.202300 | olfactory receptor, family 51, subfamily E, member 2                                                            | OR51E2        | 11p15         | 81285 AY033942.1;  |
| Hs.66170  | SET and MYND domain containing 2                                                                                | SMYD2         | 1q32.3        | 56950 BC039890.1;  |
| Hs.438862 | EPS8-like 1                                                                                                     | EPS8L1        | 19q13.42      | 54869 AK075098.1;  |
| Hs.352341 | stress 70 protein chaperone, microsome-associated, 60kDa                                                        | STCH          | 21q11.1       | 6782 BC036370.2;   |
| Hs.79241  | B-cell CLL/lymphoma 2                                                                                           | BCL2          | 18q21.33      | 596 M14745.1;      |
| Hs.153003 | serine/threonine kinase 16                                                                                      | STK16         | 2q34-q37      | 8576 AK096954.1;   |
| Hs.238648 | oncostatin M receptor                                                                                           | OSMR          | 5p13.2        | 9180 U60805.1;     |
| Hs.276808 | mannosyl (beta-1,4)-glycoprotein beta-1,4-N-acetylglucosaminyltransferase                                       | MGAT3         | 22q13.1       | 4248 L48489.1;     |
| Hs.26630  | ATP-binding cassette, sub-family A (ABC1), member 3                                                             | ABCA3         | 16p13.3       | 21 U78735.1;       |
| Hs.184664 | hypothetical protein FLJ13611                                                                                   | FLJ13611      | 5q12.3        | 80006 AF088056.1;  |
| Hs.436928 | deoxyribonuclease I                                                                                             | DNASE1        | 16p13.3       | 1773 D17270.1;     |
| Hs.85482  | ubiquitin specific protease 13 (isopeptidase T-3)                                                               | USP13         | 3q26.2-q26.3  | 8975 U75362.1;     |
| Hs.59260  | solute carrier family 6 (neurotransmitter transporter), member 16                                               | SLC6A16       | 19q13.1-q13.4 | 28968 BC034948.1;  |
| Hs.376810 | zinc finger protein 23 (KOX 16)                                                                                 | ZNF23         | 16q22         | 7571 NM_145911.1;  |
| Hs.405467 | DNA glycosylase hFPG2                                                                                           | FLJ10858      | 4q34.3        | 55247 AB079071.1;  |
| Hs.73875  | fumarylacetoacetate hydrolase (fumarylacetoacetase)                                                             | FAH           | 15q23-q25     | 2184 S63548.1;     |
| Hs.321214 | hypothetical protein DKFZp564D0478                                                                              | DKFZP564D0478 | 1p35.3        | 84065 AK095889.1;  |

Table E: The list of genes found exclusively in the QD integrated set.

This list contains only those genes found in an RFE analysis of both leukemia data sets integrated by QD, that were not found in both single set analyses.

Abbreviations: QD, quantile discretization; RFE recursive feature elimination



**QD intersect Bullinger and Valk, but not in combined set**

| UnigeneID | Description                                                                  | Symbol   | Cytoband    | LocusLinkID | Acc No      |
|-----------|------------------------------------------------------------------------------|----------|-------------|-------------|-------------|
| Hs.292541 | zinc finger, DHHC domain containing 14                                       | ZDHHHC14 | 6q25.3      | 79683       | BC040707.1; |
| Hs.149609 | integrin, alpha 5 (fibronectin receptor, alpha polypeptide)                  | ITGA5    | 12q11-q13   | 3678        | X06256.1;   |
| Hs.12862  | radical fringe homolog (Drosophila)                                          | RFNG     | 17q25       | 5986        | AF038196.1; |
| Hs.2340   | junction plakoglobin                                                         | JUP      | 17q21       | 3728        | M23410.1;   |
| Hs.415067 | coronin, actin binding protein, 1A                                           | CORO1A   | 16p12.1     | 11151       | AK096332.1; |
| Hs.2463   | angiopoietin 1                                                               | ANGPT1   | 8q22.3-q23  | 284         | U83508.1;   |
| Hs.96731  | huntingtin interacting protein-1-related                                     | HIP1R    | 12q24       | 9026        | BC011354.2; |
| Hs.76873  | hyaluronoglucosaminidase 2                                                   | HYAL2    | 3p21.3      | 8692        | AK092449.1; |
| Hs.528644 | hypothetical protein FLJ11127                                                | FLJ11127 | 5p15.2      | 54491       | BC011524.1; |
| Hs.436348 | potassium channel tetramerisation domain containing 15                       | KCTD15   | 19q13.12    | 79047       | AK096843.1; |
| Hs.190783 | histidine ammonia-lyase                                                      | HAL      | 12q22-q24.1 | 3034        | D16626.1;   |
| Hs.48778  | chromosome 1 open reading frame 24                                           | C1orf24  | 1q25        | 116496      | AK095547.1; |
| Hs.99915  | androgen receptor (dihydrotestosterone receptor; testicular feminization; AR | AR       | Xq11.2-q12  | 367         | AF321914.1; |

Table F: The list of genes found by RFE in both single-set leukemia analyses, but not in analysis of both sets integrated by QD. This list is the intersection of the three gene lists generated on the data of Bullinger et al, Valk et al without the genes also found in the list generated on the data of both studies integrated by QD. Abbreviations: QD, quantile discretization, RFE, recursive feature elimination
