# Supplementary material for: Cross-platform analysis of cancer microarray data improves gene expression based classification of phenotypes
Source: Springer Nature journal article supplement (doi:10.1186/1471-2105-6-265), 2005-11-04

**a**

## Classifier performance evaluation by independent test set

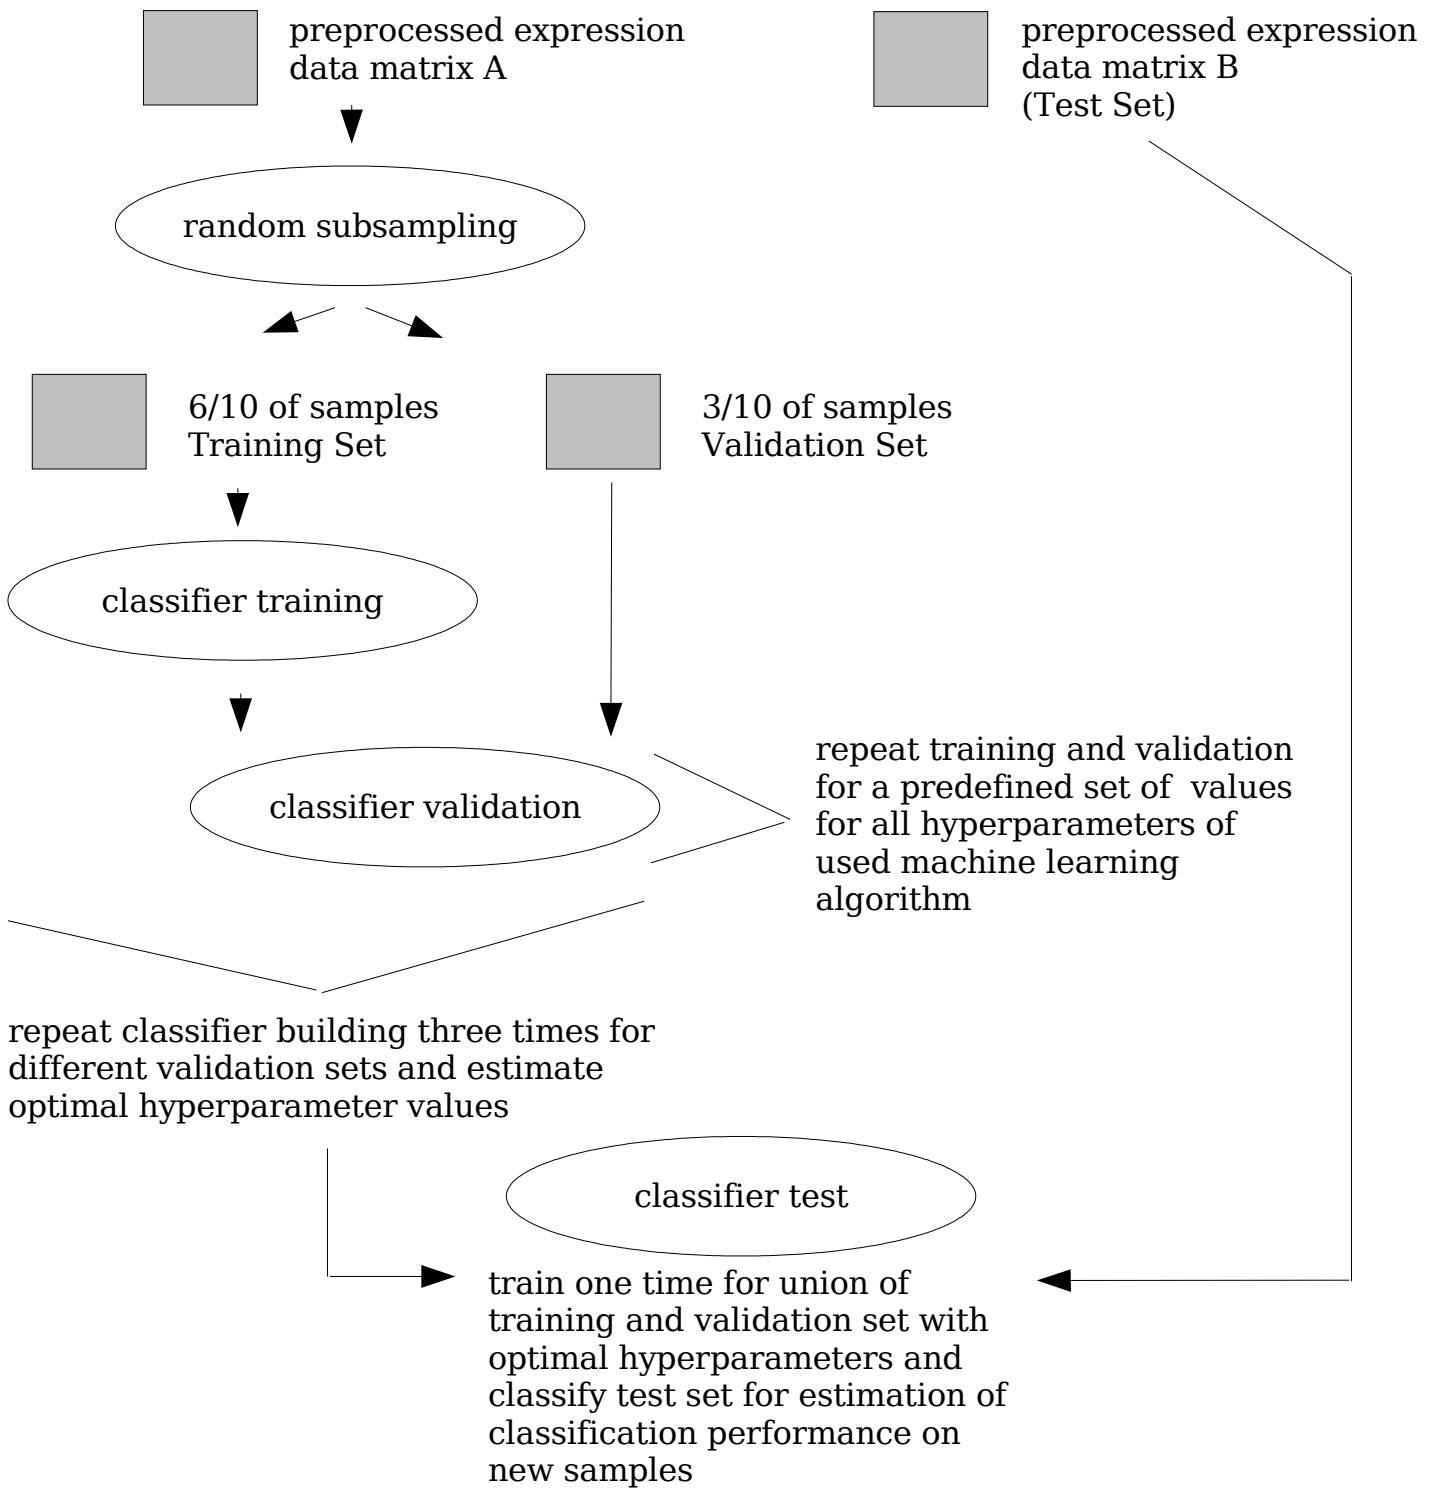

**b**

## Classifier performance evaluation by repeated cross-validation

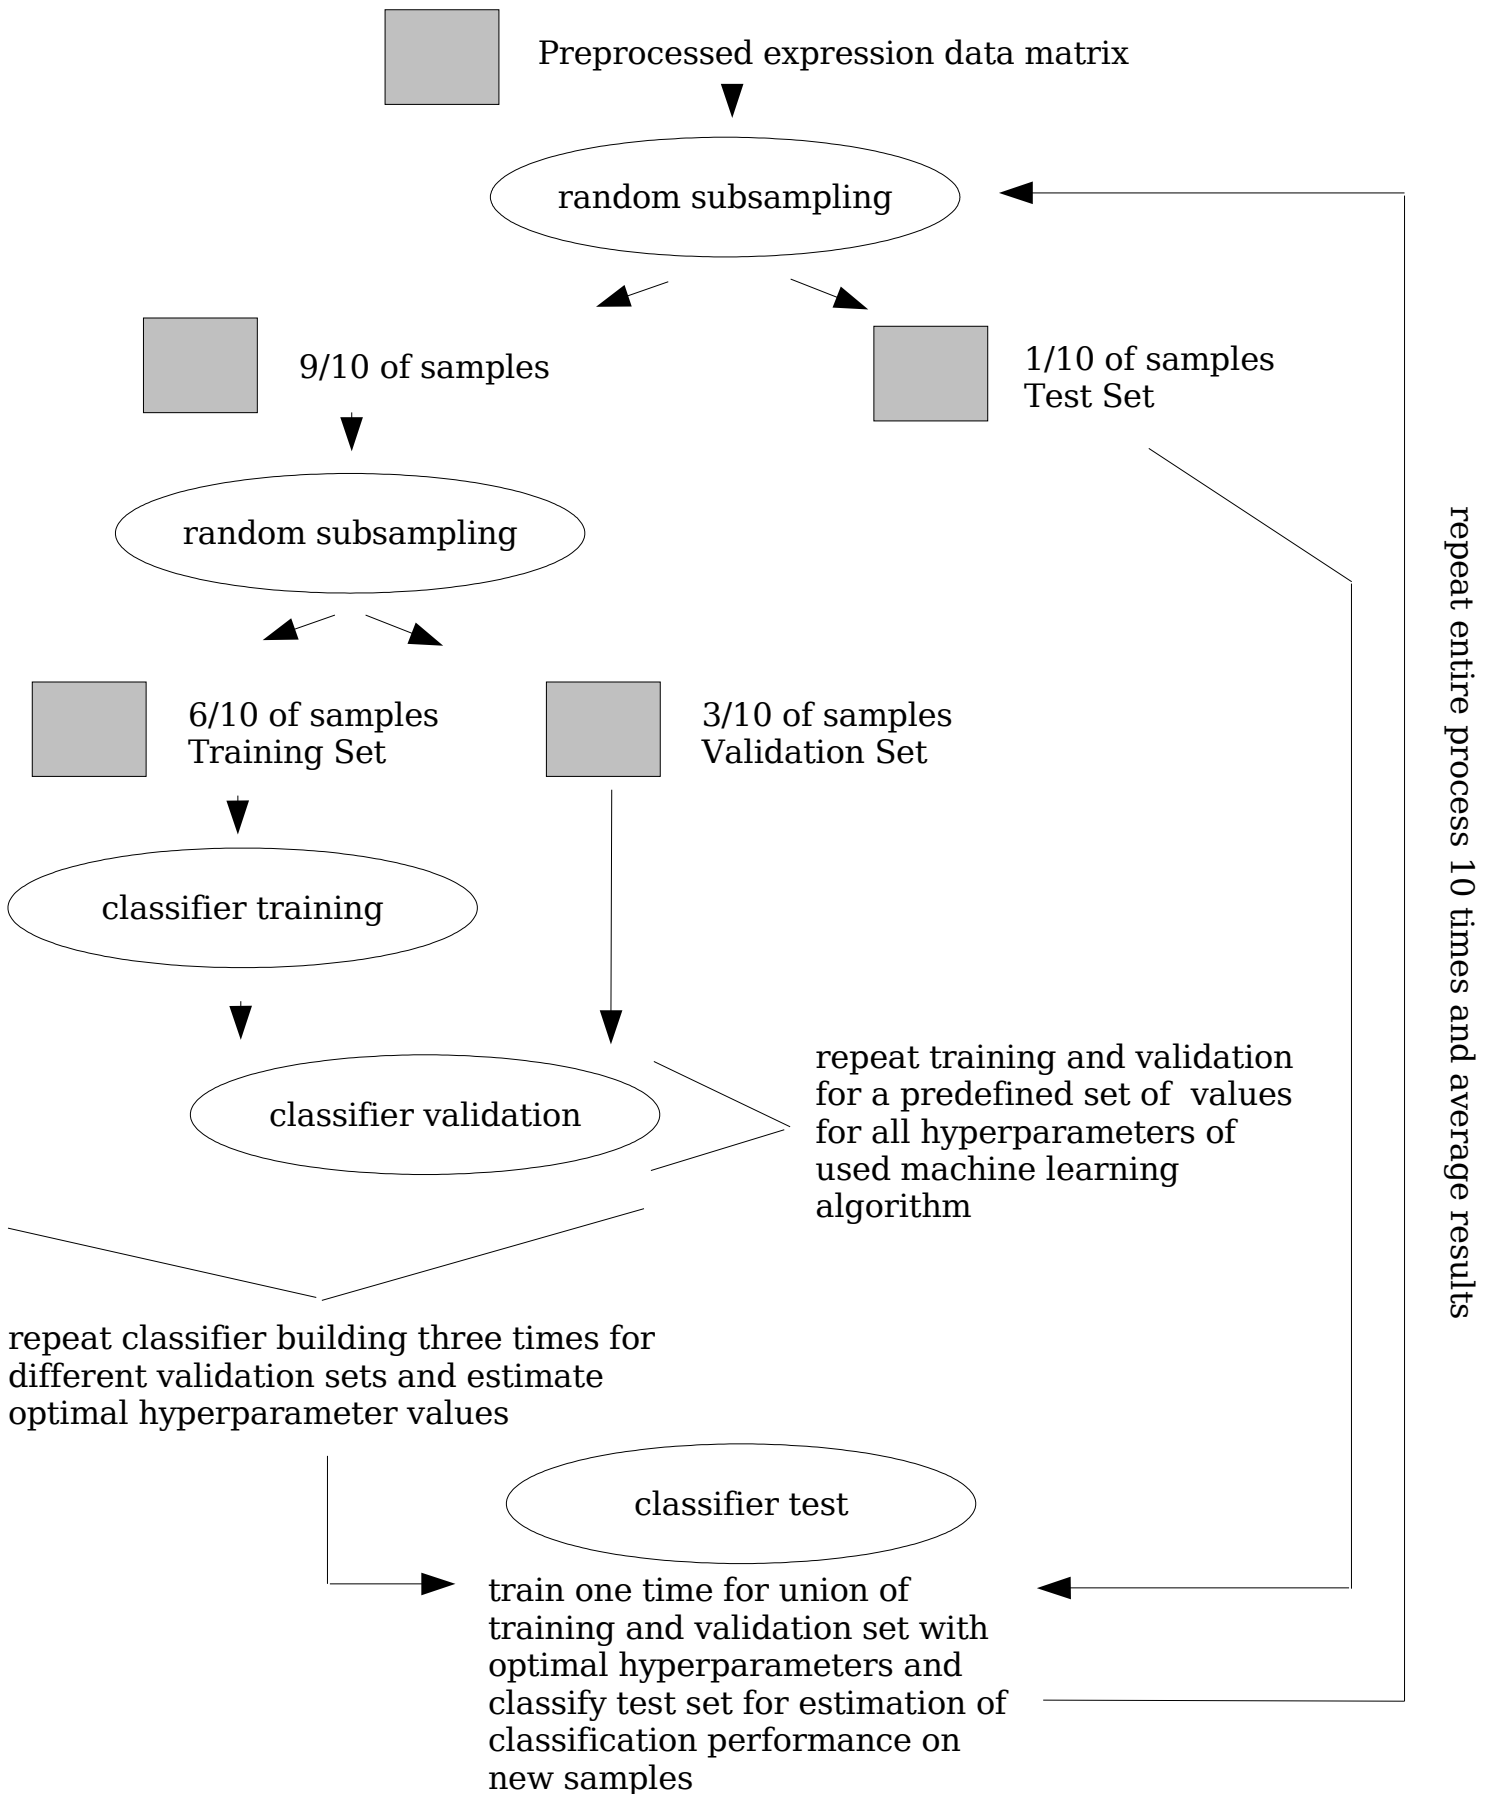

Supplement: 12859_2005_590_MOESM5_ESM.pdf [file 12859_2005_590_MOESM5_ESM.pdf]
