# Supplementary material for: Cross-platform analysis of cancer microarray data improves gene expression based classification of phenotypes
Source: Springer Nature journal article supplement (doi:10.1186/1471-2105-6-265), 2005-11-04
Supplement: 12859_2005_590_MOESM7_ESM.pdf [file 12859_2005_590_MOESM7_ESM.pdf]

**non**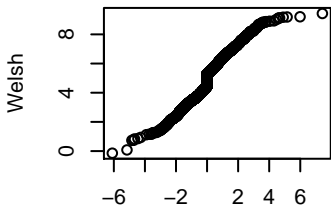

Dhanasekaran

**MRS**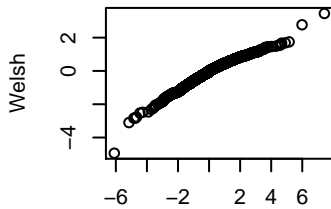

Dhanasekaran

**QD**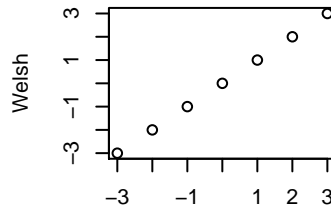

Dhanasekaran

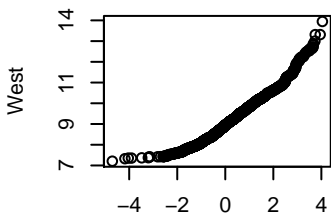

Gruvberger

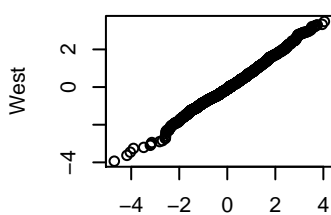

Gruvberger

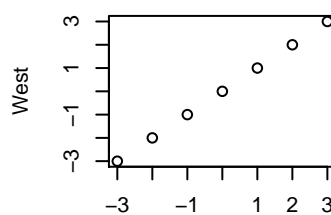

Gruvberger

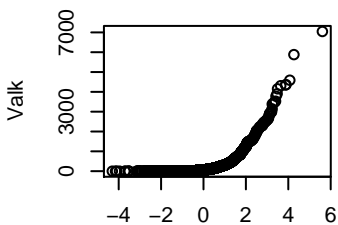

Bullinger

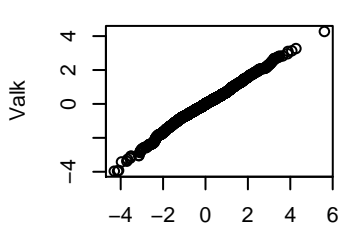

Bullinger

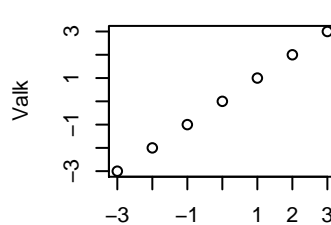

Bullinger
