# Supplementary material for: Cross-platform analysis of cancer microarray data improves gene expression based classification of phenotypes
Source: Springer Nature journal article supplement (doi:10.1186/1471-2105-6-265), 2005-11-04
Supplement: 12859_2005_590_MOESM11_ESM.pdf [file 12859_2005_590_MOESM11_ESM.pdf]

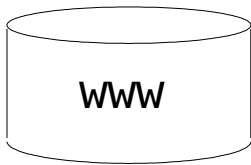

retrieve and preprocess  
gene expression data

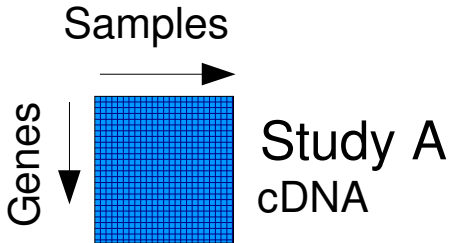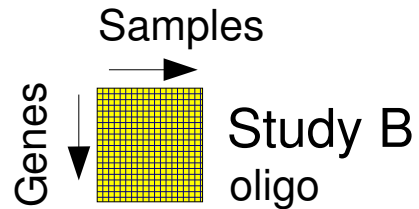

match to UniGene and  
intersect

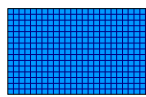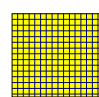

derive summary  
information

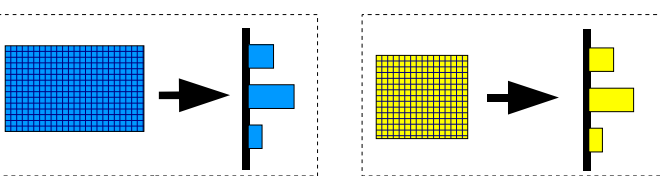

data integration  
with MRS or QD

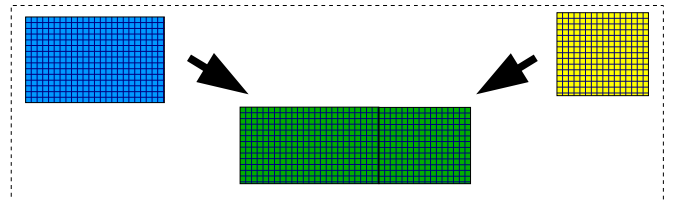

combine summary  
information in  
meta-analysis

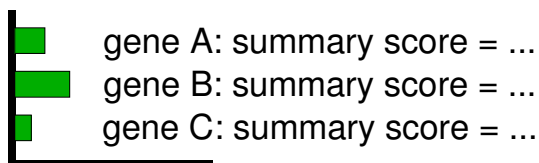

**meta-analysis**

classification analysis

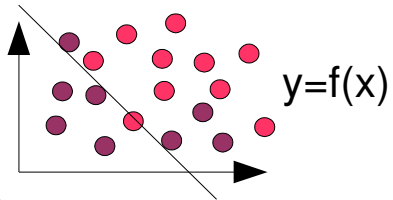

gene selection by RFE

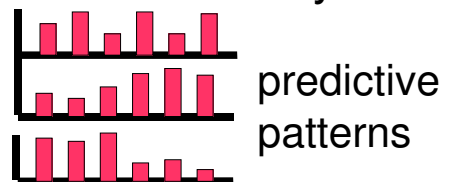

**cross-platform classification**
